# Supplementary material
Source: publisher site journal article supplement (https://www.spandidos-publications.com/4108/downloadSupplementary)

Figure S1. Huh6 tumors from the *in vivo* experiment in SCID mice. (A) Absolute tumor volumes without adjustment, shown as the mean  $\pm$  standard deviation, were compared between control (n=5), CDDP (n=4), birinapant (n=4) and CDDP + birinapant (n=4) groups. (B) Representative tumor images (n=3 per group) on day 42. CDDP, cisplatin.

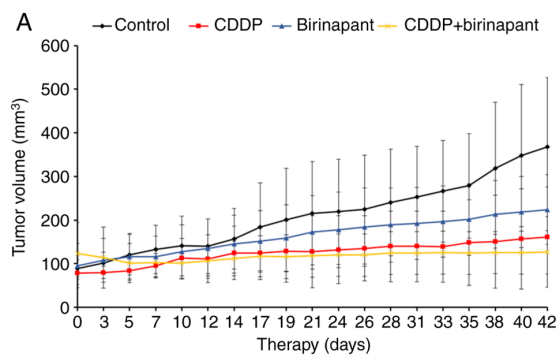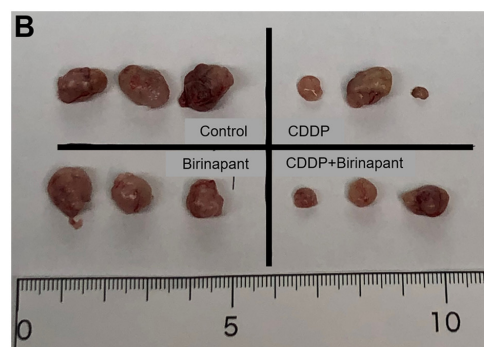

Supplement: Supplementary file 1 [file downloadSupplementary]
